# Supplementary material for: A 3D porous interconnected NaVPO4F/C network: preparation and performance for Na-ion batteries
Source: Royal Society of Chemistry journal article supplement (doi:10.1039/c5ra05161d), 2015-01-01
Supplement: c5ra05161d1.pdf [file c5ra05161d1.pdf]

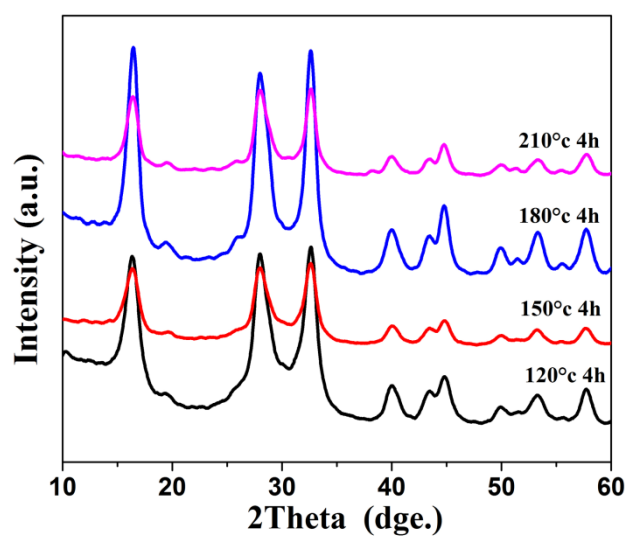

Figure S1 XRD patterns of NaVPO<sub>4</sub>F/C precursors with different temperatures for 4h .

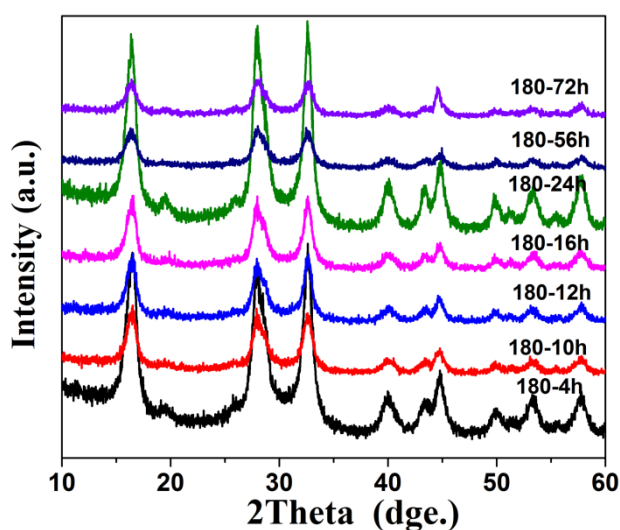

Figure S2 XRD patterns of NaVPO<sub>4</sub>F/C precursors with different times at 180 °C.

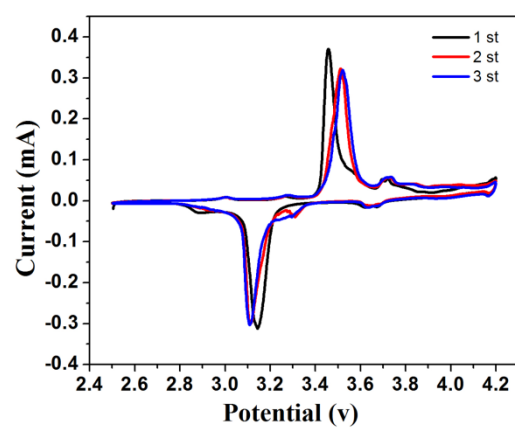

Figure S3 Cyclic voltammograms  $\text{NaVPO}_4\text{F}$  sintered at  $800\text{ }^\circ\text{C}$  at a scan rate of  $0.1\text{ mV}\cdot\text{s}^{-1}$

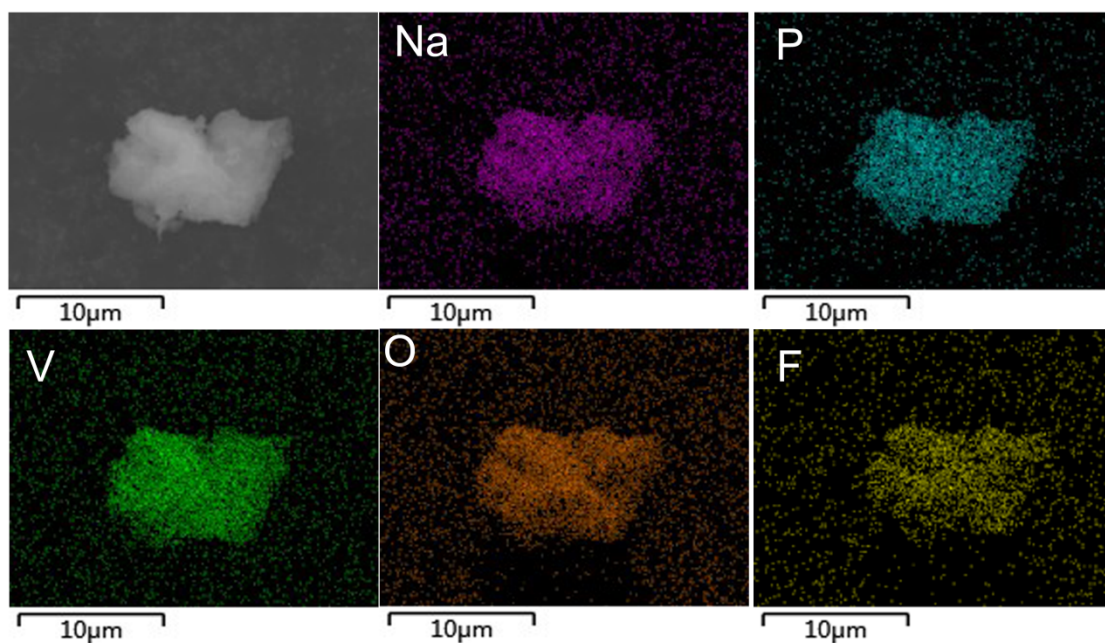

Figure S4 EDS of  $\text{NaVPO}_4\text{F}/\text{C}$  precursor

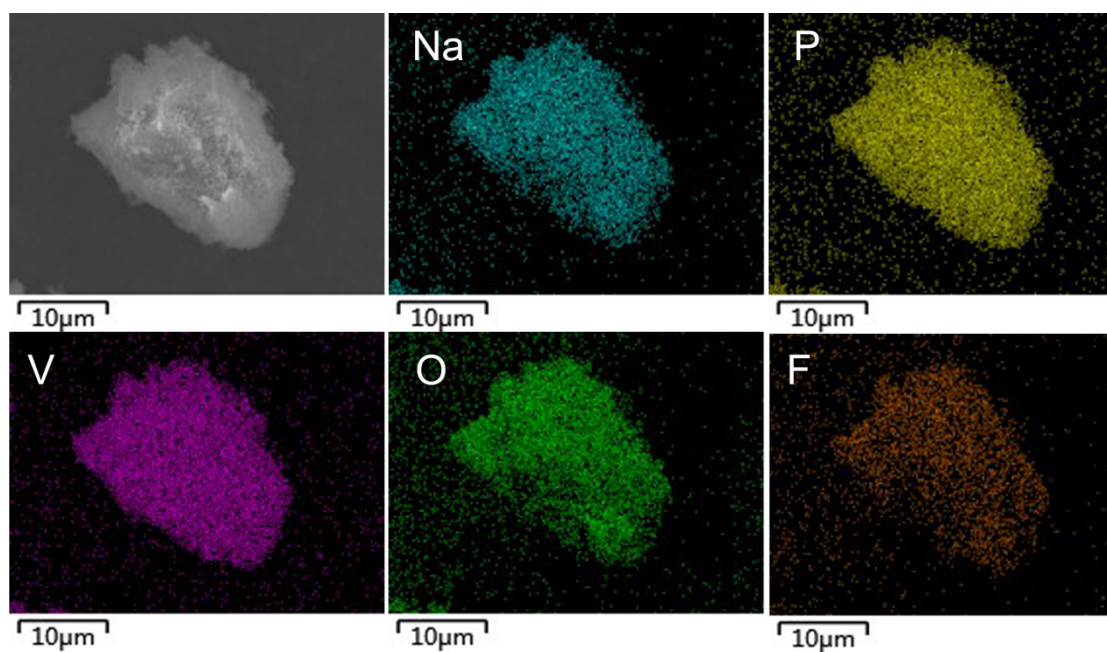

Figure S5 EDS of NaVPO<sub>4</sub>F/C sintered at 750 °C

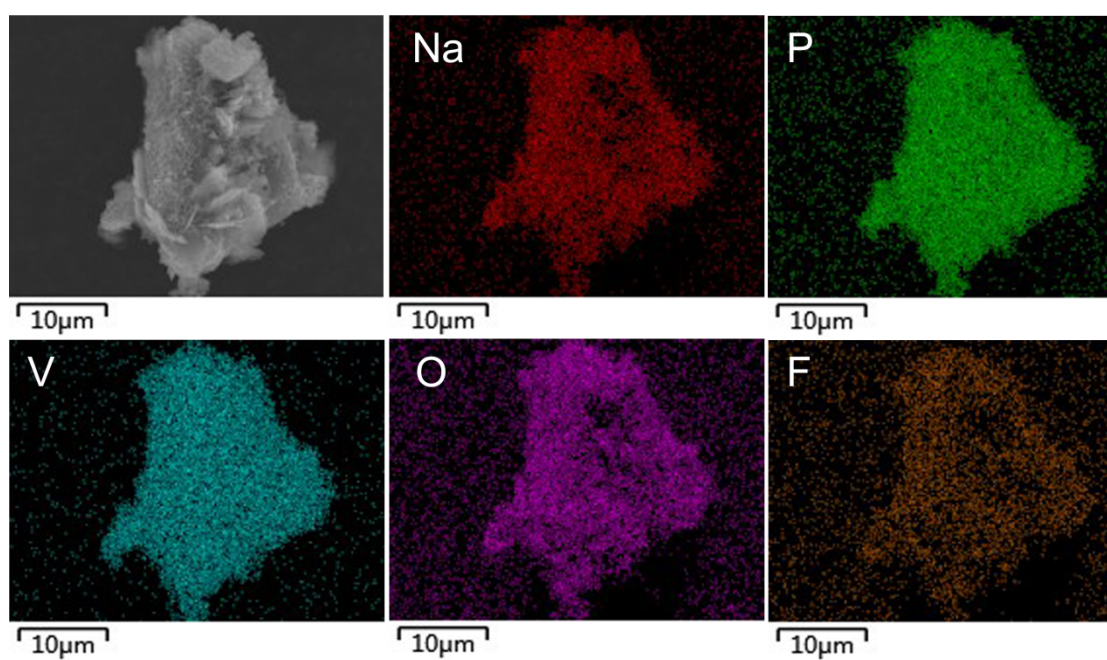

Figure S6 EDS of NaVPO<sub>4</sub>F/C sintered at 800 °C
